# Supplementary material
Source: PubMed Central journal article supplement (PMC6558521)
Supplement: NIHMS1515902-supplement-5.pdf [file NIHMS1515902-supplement-5.pdf]

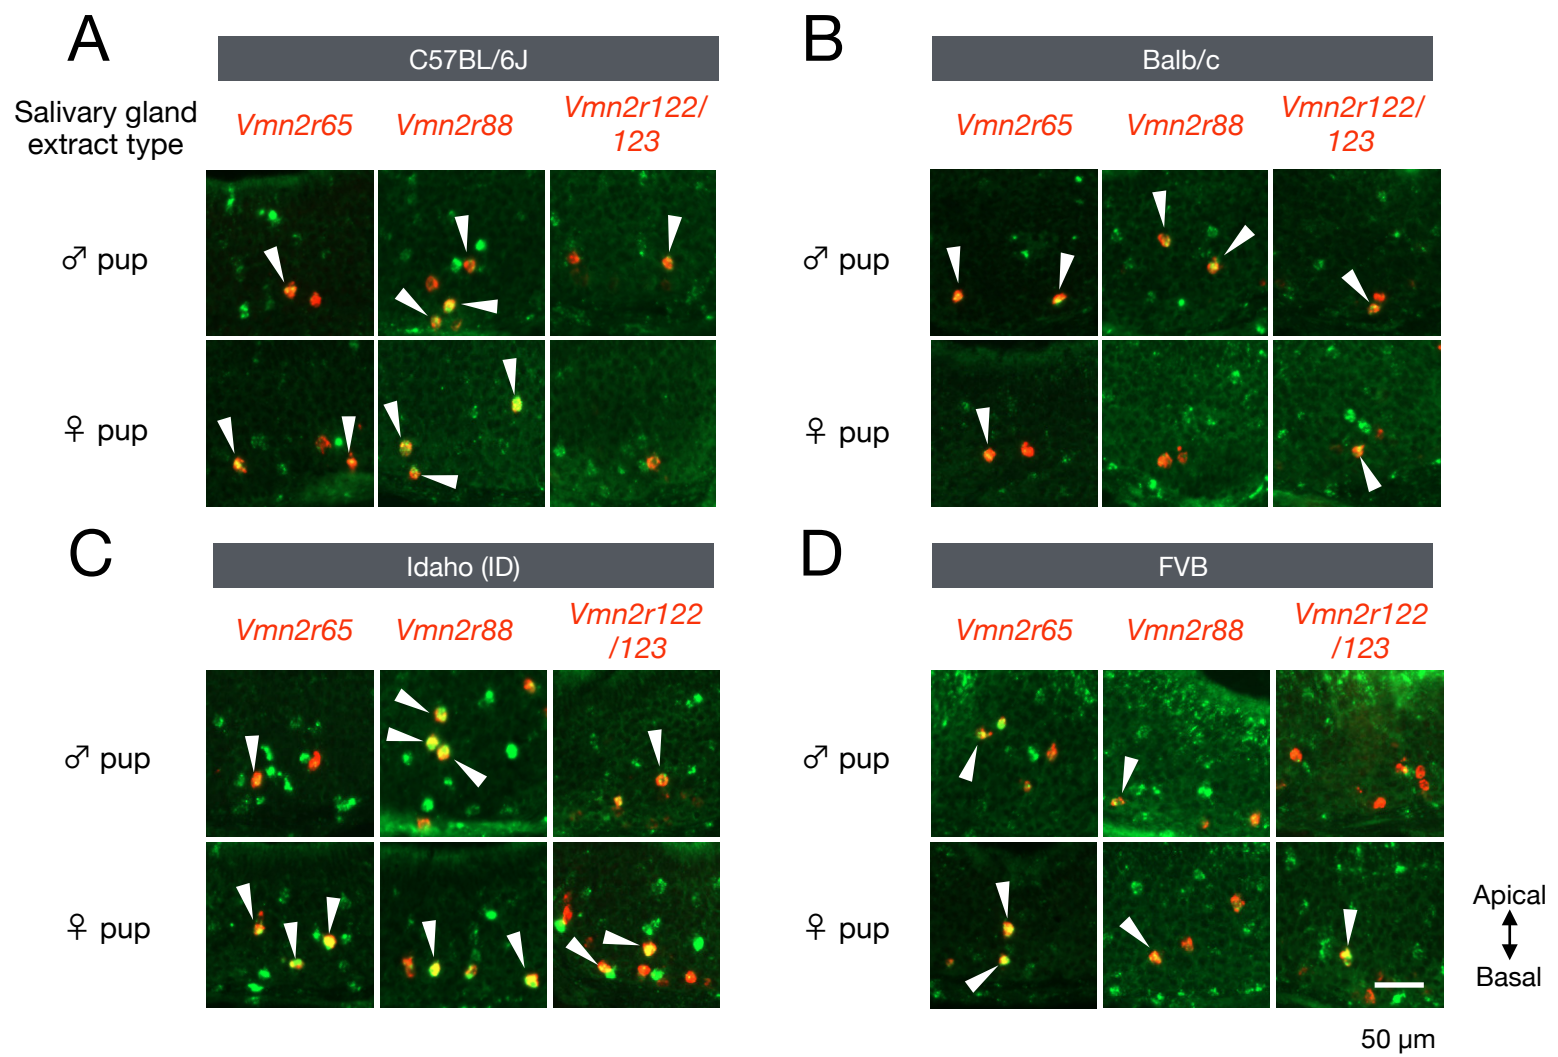

**E** % *Egr1* positive cells in receptor positive cells  
(n = number of receptor positive neurons quantified)

|                             |       | Vmn2r65           |                  |                  |                  |
|-----------------------------|-------|-------------------|------------------|------------------|------------------|
|                             |       | C57BL/6J          | ID               | Balb/c           | FVB              |
| salivary gland extract type | ♂ pup | 51.1±5.6 (n=63)   | 46.5±22.7 (n=47) | 33.6±3.2 (n=47)  | 58.3±6.2 (n=54)  |
|                             | ♀ pup | 57.5±17.0 (n=88)  | 90.5±0.5 (n=52)  | 56.8±0.8 (n=77)  | 71.0±8.5 (n=58)  |
|                             |       | Vmn2r88           |                  |                  |                  |
|                             |       | C57BL/6J          | ID               | Balb/c           | FVB              |
| salivary gland extract type | ♂ pup | 53.7±7.8 (n=113)  | 58.6±41.4 (n=72) | 45.8±20.8 (n=71) | 39.4±18.6 (n=55) |
|                             | ♀ pup | 36.2±15.6 (n=128) | 95.5±4.5 (n=76)  | 7.1±7.1 (n=79)   | 41.0±31.9 (n=70) |
|                             |       | Vmn2r122/123      |                  |                  |                  |
|                             |       | C57BL/6J          | ID               | Balb/c           | FVB              |
| salivary gland extract type | ♂ pup | 42.2±2.2 (n=28)   | 53.8±46.2 (n=24) | 57.2±29.4 (n=31) | 24.8±16.8 (n=62) |
|                             | ♀ pup | 40.6±23.8 (n=54)  | 65.0±15.0 (n=34) | 67.0±9.9 (n=26)  | 23.4±14.7 (n=44) |
