# Supplementary material
Source: PubMed Central journal article supplement (PMC6558521)
Supplement: NIHMS1515902-supplement-6.pdf [file NIHMS1515902-supplement-6.pdf]

A

| Description                                                     | # Unique Peptides | MW [kDa]    | Salivary gland selective ? | Secreted ? |
|-----------------------------------------------------------------|-------------------|-------------|----------------------------|------------|
| WD repeat-containing protein 1, GN=Wdr1                         | 26                | 66.4        | n                          | n          |
| Moesin GN=Msn                                                   | 8                 | 67.7        | n                          | n          |
| Phosphoglycerate mutase 1 GN=Pgam1                              | 10                | 28.8        | n                          | n          |
| Radixin GN=Rdx                                                  | 6                 | 68.5        | n                          | n          |
| <b>Isoform 3 of Submandibular gland protein C GN=Muc19/Smgc</b> | <b>6</b>          | <b>70.8</b> | <b>y</b>                   | <b>y</b>   |
| Serine--tRNA ligase, cytoplasmic (Fragment) GN=Sars             | 6                 | 40.1        | n                          | n          |
| Peroxiredoxin-2 GN=Prdx2                                        | 5                 | 21.8        | n                          | n          |
| Triosephosphate isomerase GN=Tpi1                               | 5                 | 18.0        | n                          | n          |
| Androgen binding protein alpha GN=Scgb1b27                      | 4                 | 10.1        | y                          | y          |
| MCG117626 GN=Obp1a                                              | 3                 | 18.5        | y                          | y          |
| Ezrin GN=Ezr                                                    | 1                 | 69.4        | n                          | n          |
| Alpha-1B-glycoprotein GN=A1bg                                   | 2                 | 56.5        | unknown                    | y          |
| Protein Obp1b GN=Obp1b                                          | 3                 | 19.4        | y                          | y          |

B

| Description                                                                                                                                                                                                                                                                                                                                                                                                                                                                                                                                                                                                                                                                        | # Unique Peptides | MW [kDa]     |
|------------------------------------------------------------------------------------------------------------------------------------------------------------------------------------------------------------------------------------------------------------------------------------------------------------------------------------------------------------------------------------------------------------------------------------------------------------------------------------------------------------------------------------------------------------------------------------------------------------------------------------------------------------------------------------|-------------------|--------------|
| <b>Isoform 3 of Submandibular gland protein C GN=Muc19/Smgc</b>                                                                                                                                                                                                                                                                                                                                                                                                                                                                                                                                                                                                                    | <b>19</b>         | <b>64.57</b> |
| <p>[K].ILEQITSAPGGSVSSAVENLK.[A]<br/> [K].GIVEPITSAAGGSVSSAVENLK.[A]<br/> [R].GSLNVNPLSGLSTK.[S]<br/> [K].ILEQITSAPGGSAERPNAQSSNNLSGK.[L]<br/> [K].KFIEPLTEDHGPTSTASVSGDSSTSSR.[L]<br/> [K].QNVESNSSTGSATSNGGGDSNEVR.[G]<br/> [K].QNVEDSTLSTGSATSNEGDDK.[S]<br/> [R].SNVSTGGEP SDKNEPADPGVSGR.[V]<br/> [R].GPSSSAVDSTDSGDRGNLADK.[Q]<br/> [K].SSDNSSNTFREDLEK.[I]<br/> [K].VSGDDPTVQGHDAASDGSK.[Q]<br/> [R].GPSSSAVDSTDSGDR.[G]<br/> [K].FLEEQYGQTGTDAVSGMSESSR.[S]<br/> [K].FIEPLTEDHGPTSTASVSGDSSTSSR.[L]<br/> [K].QGPFGNGPEGVGENNGGSFR.[A]<br/> [K].SDSGSHNLSSGSGSR.[S]<br/> [R].SNVHLSDFSMESGDDATVQQQAAASGGPK.[Q]<br/> [K].SGNDATVQQQAAASGGSK.[H]<br/> [R].LDGHSSDGLSK.[V]</p> |                   |              |
