# Supplementary material
Source: PubMed Central journal article supplement (PMC6558521)
Supplement: NIHMS1515902-supplement-7.pdf [file NIHMS1515902-supplement-7.pdf]

**A**

| Uniprot id    | Hits in C57BL6/J male salivary gland (ACTIVE)           | Coverage (%)  | C57BL6/J female salivary gland (ACTIVE) | 129S1 male salivary gland (LESS ACTIVE) |
|---------------|---------------------------------------------------------|---------------|-----------------------------------------|-----------------------------------------|
| <b>A8DUK4</b> | <b>Beta-globin GN=Hbbt1</b>                             | <b>100.00</b> | <b>y</b>                                | <b>low</b>                              |
| Q91VB8        | Alpha globin 1 GN=haemaglobin alpha 2                   | 93.66         | y                                       | y                                       |
| P02089        | Hemoglobin subunit beta-2 GN=Hbb-b2                     | 44.90         | y                                       | y                                       |
| P15949        | Kallikrein 1-related peptidase b9 GN=Klk1b9             | 75.48         | y                                       | y                                       |
| P36369        | Kallikrein 1-related peptidase b26 GN=Klk1b26 (egfbp-2) | 74.71         | n                                       | n                                       |
| P00755        | Kallikrein 1-related peptidase b1 GN=Klk1b1             | 63.98         | y                                       | y                                       |
| P00756        | Kallikrein 1-related peptidase b3 GN=Klk1b3             | 65.90         | y                                       | y                                       |
| P04071        | Kallikrein 1-related peptidase b16 GN=Klk1b16           | 60.92         | y                                       | y                                       |
| P15946        | Kallikrein 1-related peptidase b11 GN=Klk1b11           | 53.26         | y                                       | y                                       |
| Q61759        | Kallikrein 1-related peptidase b21 GN=Klk1b21           | 42.15         | n                                       | y                                       |
| P15948        | Kallikrein 1-related peptidase b22 GN=Klk1b22           | 54.44         | y                                       | n                                       |
| P01132        | Pro-epidermal growth factor GN=Egf                      | 26.87         | y                                       | y                                       |
| Q61754        | Kallikrein 1-related peptidase b24 GN=Klk1b24           | 41.83         | n                                       | n                                       |
| Q9JM71        | Kallikrein 1-related peptidase b27 GN=Klk1b27           | 43.35         | y                                       | y                                       |
| P15945        | Kallikrein 1-related peptidase b5 GN=Klk1b5             | 52.87         | n                                       | n                                       |

**B**

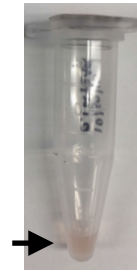

**C**

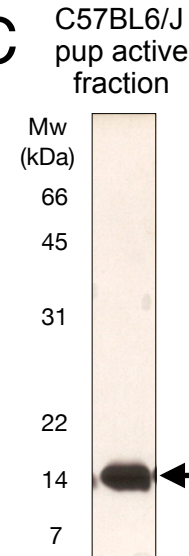

**D**

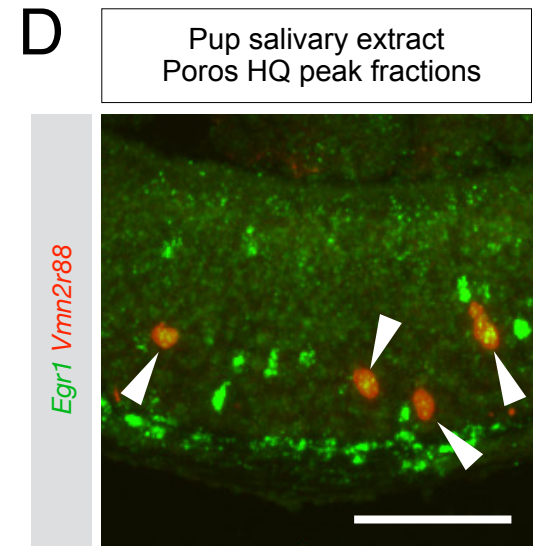

**E**

| Description                                  | # Unique Peptides | MW [kDa]      |
|----------------------------------------------|-------------------|---------------|
| <b>Beta-globin GN=Hbbt1</b>                  | <b>16</b>         | <b>15.738</b> |
| [K].DFTPAAQAAFQK.[V]                         |                   |               |
| [K].GTFASLSELHCDK.[L]                        |                   |               |
| [K].AAVSGLWGK.[V]                            |                   |               |
| [K].KVITAFNDGLNHLDSLK.[G]                    |                   |               |
| [R].LLGNMIVIVLGHHLGK.[D]                     |                   |               |
| [R].YFDSFGDLSSASAIMGNAK.[V]                  |                   |               |
| [K].AAVSGLWGKVNADVEVGGEALGR.[L]              |                   |               |
| [R].LLGNMIVIVLGHHLGK.[D]                     |                   |               |
| [K].GTFASLSELHCDKLHVDPENFR.[L]               |                   |               |
| [K].KVITAFNDGLNHLDSLK.[G]                    |                   |               |
| [R].LLVVPWTQR.[YF]                           |                   |               |
| [K].VITAFNDGLNHLDSLK.[G]                     |                   |               |
| <b>Alpha globin 1 GN=haemaglobin alpha 2</b> | <b>7</b>          | <b>15.103</b> |
| [R].MFASFPTTK.[T]                            |                   |               |
| [K].TYFPHFDVSHGSAQVK.[G]                     |                   |               |
| [K].FLASVSTVLTSK.[Y]                         |                   |               |
| [K].LLSHCLLVTLASHHPADFTPAVHASLDK.[F]         |                   |               |
| [K].KVADALANAAGHLDDLPGALSALSDDLHAHK.[L]      |                   |               |
| [K].IGGHGAEYGAEALER.[M]                      |                   |               |
| [K].VADALANAAGHLDDLPGALSALSDDLHAHK.[L]       |                   |               |

**F**

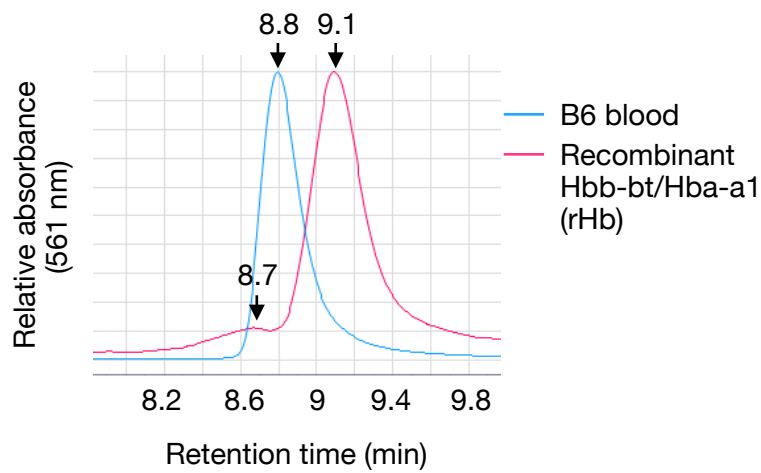

**G**

|                            | Mean  | Std dev | # rep |
|----------------------------|-------|---------|-------|
| <b>B6 blood (tetramer)</b> | 9.084 | 0.008   | 3     |
| <b>rHb (tetramer)</b>      | 8.636 | 0.016   | 3     |
| <b>rHb (dimer)</b>         | 8.785 | 0.011   | 3     |

\*\*\*p < 0.0001 by t-Test
