# Supplementary material
Source: PubMed Central journal article supplement (PMC6558521)

**A** Analysis of pup-directed behaviors ● WT♂ ○ +/-♂ ○ -/-♂ ● double KO♂

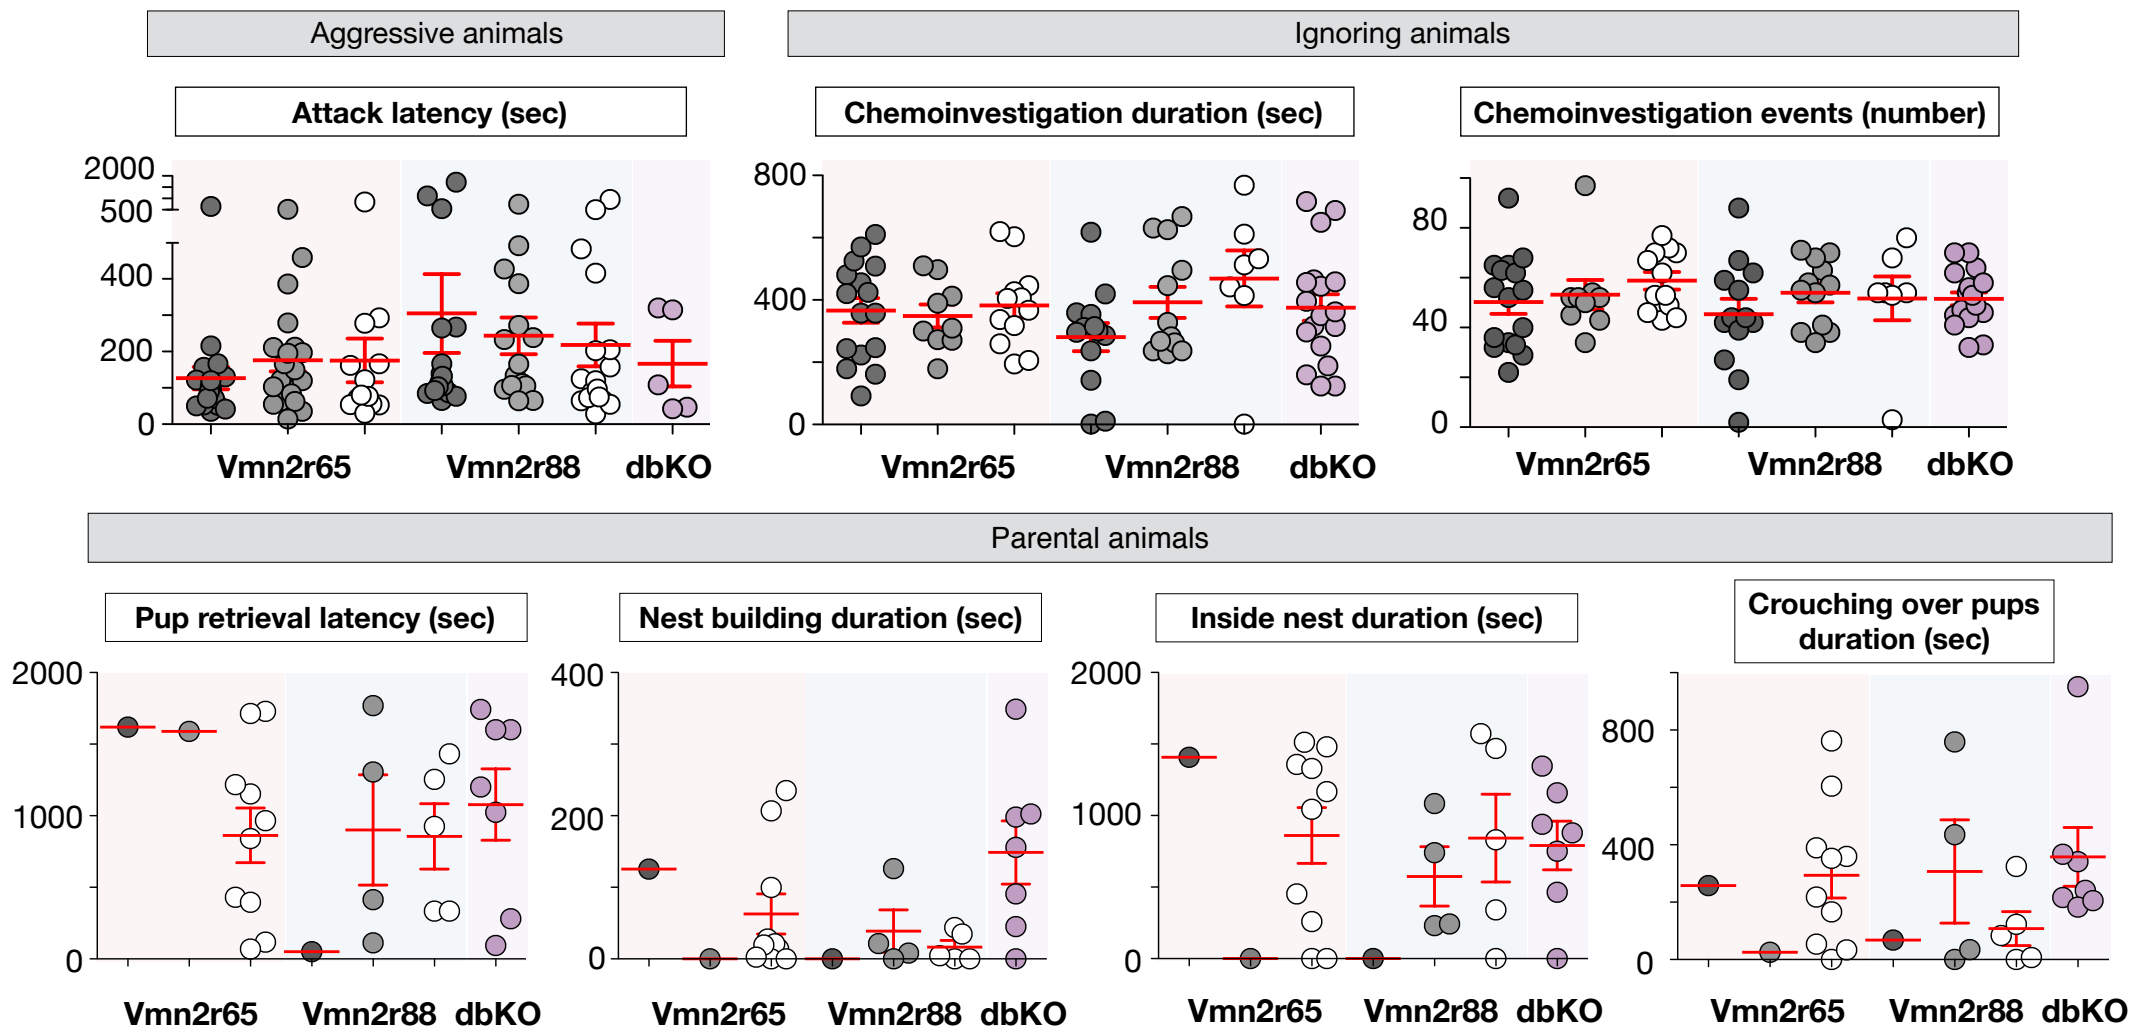

**B** Analysis of male mating behavior ● WT or Vmn2r65<sup>+/-</sup>♂ ● Vmn2r65<sup>-/-</sup>♂

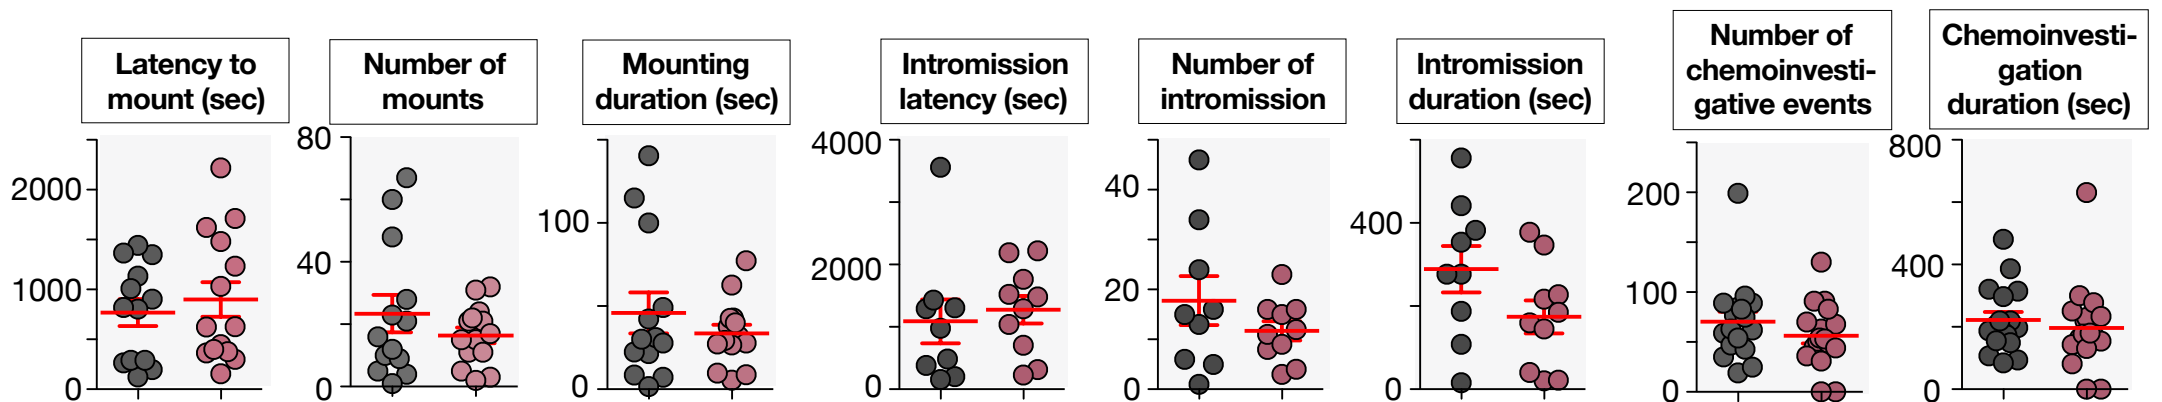

**C** Analysis of inter-male aggression ● WT♂ ● double KO♂

Total number of attacking animals

| Genotype                                           | N  | # Attacking | % Attacking |
|----------------------------------------------------|----|-------------|-------------|
| WT                                                 | 13 | 12          | 92.3        |
| Vmn2r65 <sup>-/-</sup> ;<br>Vmn2r88 <sup>-/-</sup> | 20 | 14          | 70          |

*p* = 0.20

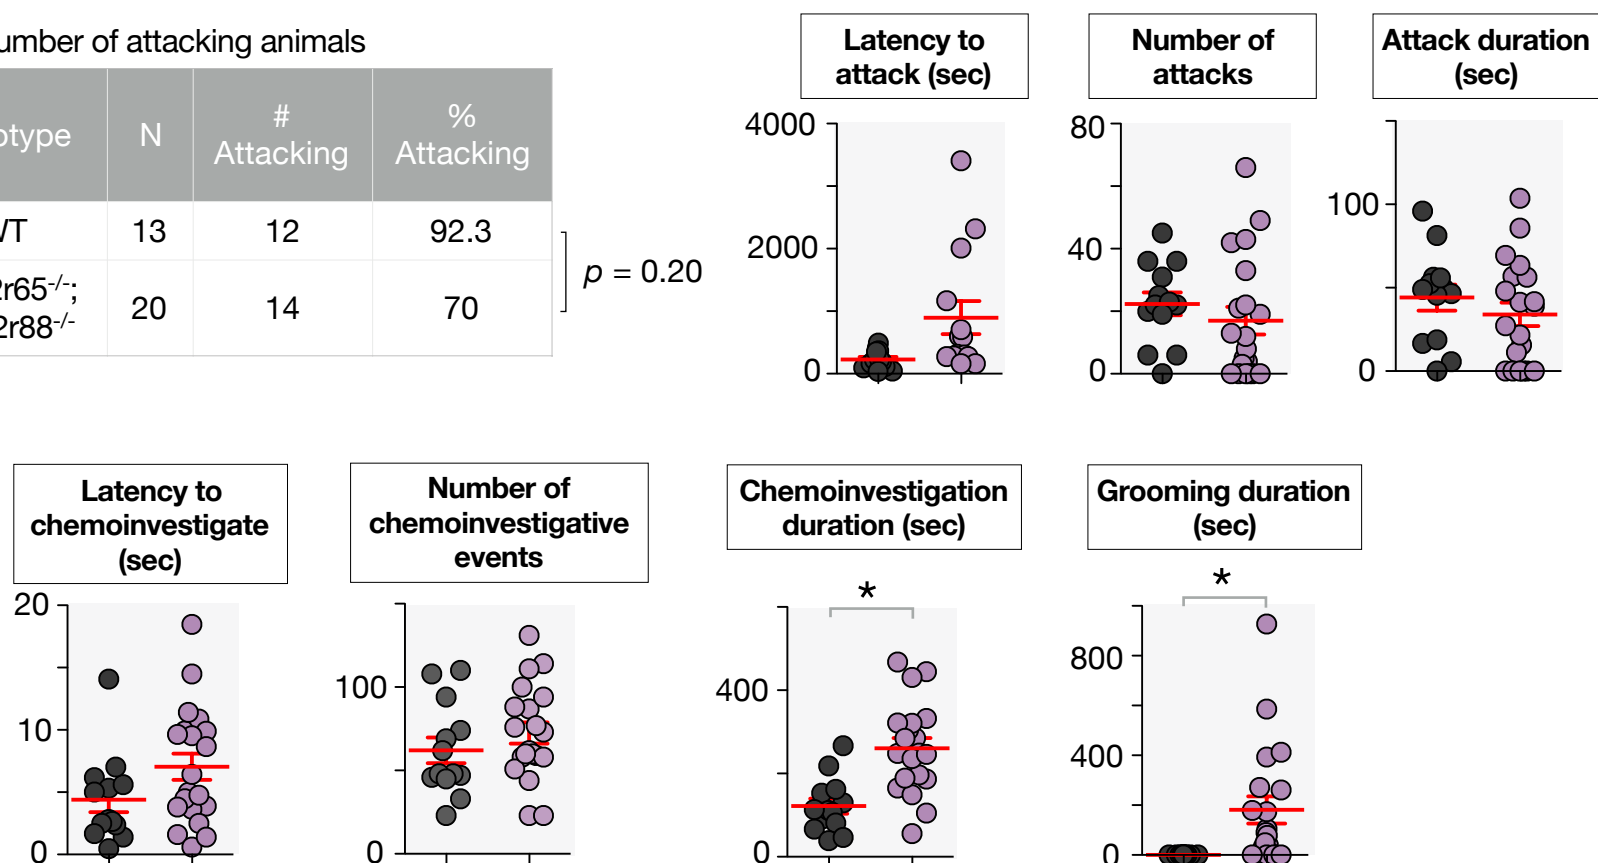

Supplement: NIHMS1515902-supplement-8.pdf [file NIHMS1515902-supplement-8.pdf]
