# Supplementary material
Source: PubMed Central journal article supplement (PMC6558521)
Supplement: NIHMS1515902-supplement-9.pdf [file NIHMS1515902-supplement-9.pdf]

| Feature type    | Specific stimuli used | Where stimulus is produced | Where stimulus is found                         | Sensory modality | Receptors       |
|-----------------|-----------------------|----------------------------|-------------------------------------------------|------------------|-----------------|
| <b>Physical</b> | Pup-like morphology   | Shape                      | pup body, fine features such as limbs and tails | tactile?         | not known       |
| <b>Chemical</b> | Smgc                  | ♀ and pup salivary gland   | on pup, ♀/pup bedding                           | VNO              | Vmn2r65         |
|                 | Hemoglobins           | erythroid cells<br>others? | on pup, ♂ and ♀/pup bedding                     | VNO              | Vmn2r88,122,123 |
|                 | V1R ligands           | not known                  | on pup, ♀/pup bedding                           | VNO              | V1rc1, c30, i9  |
