# Supplementary material
Source: PubMed Central journal article supplement (PMC6558521)

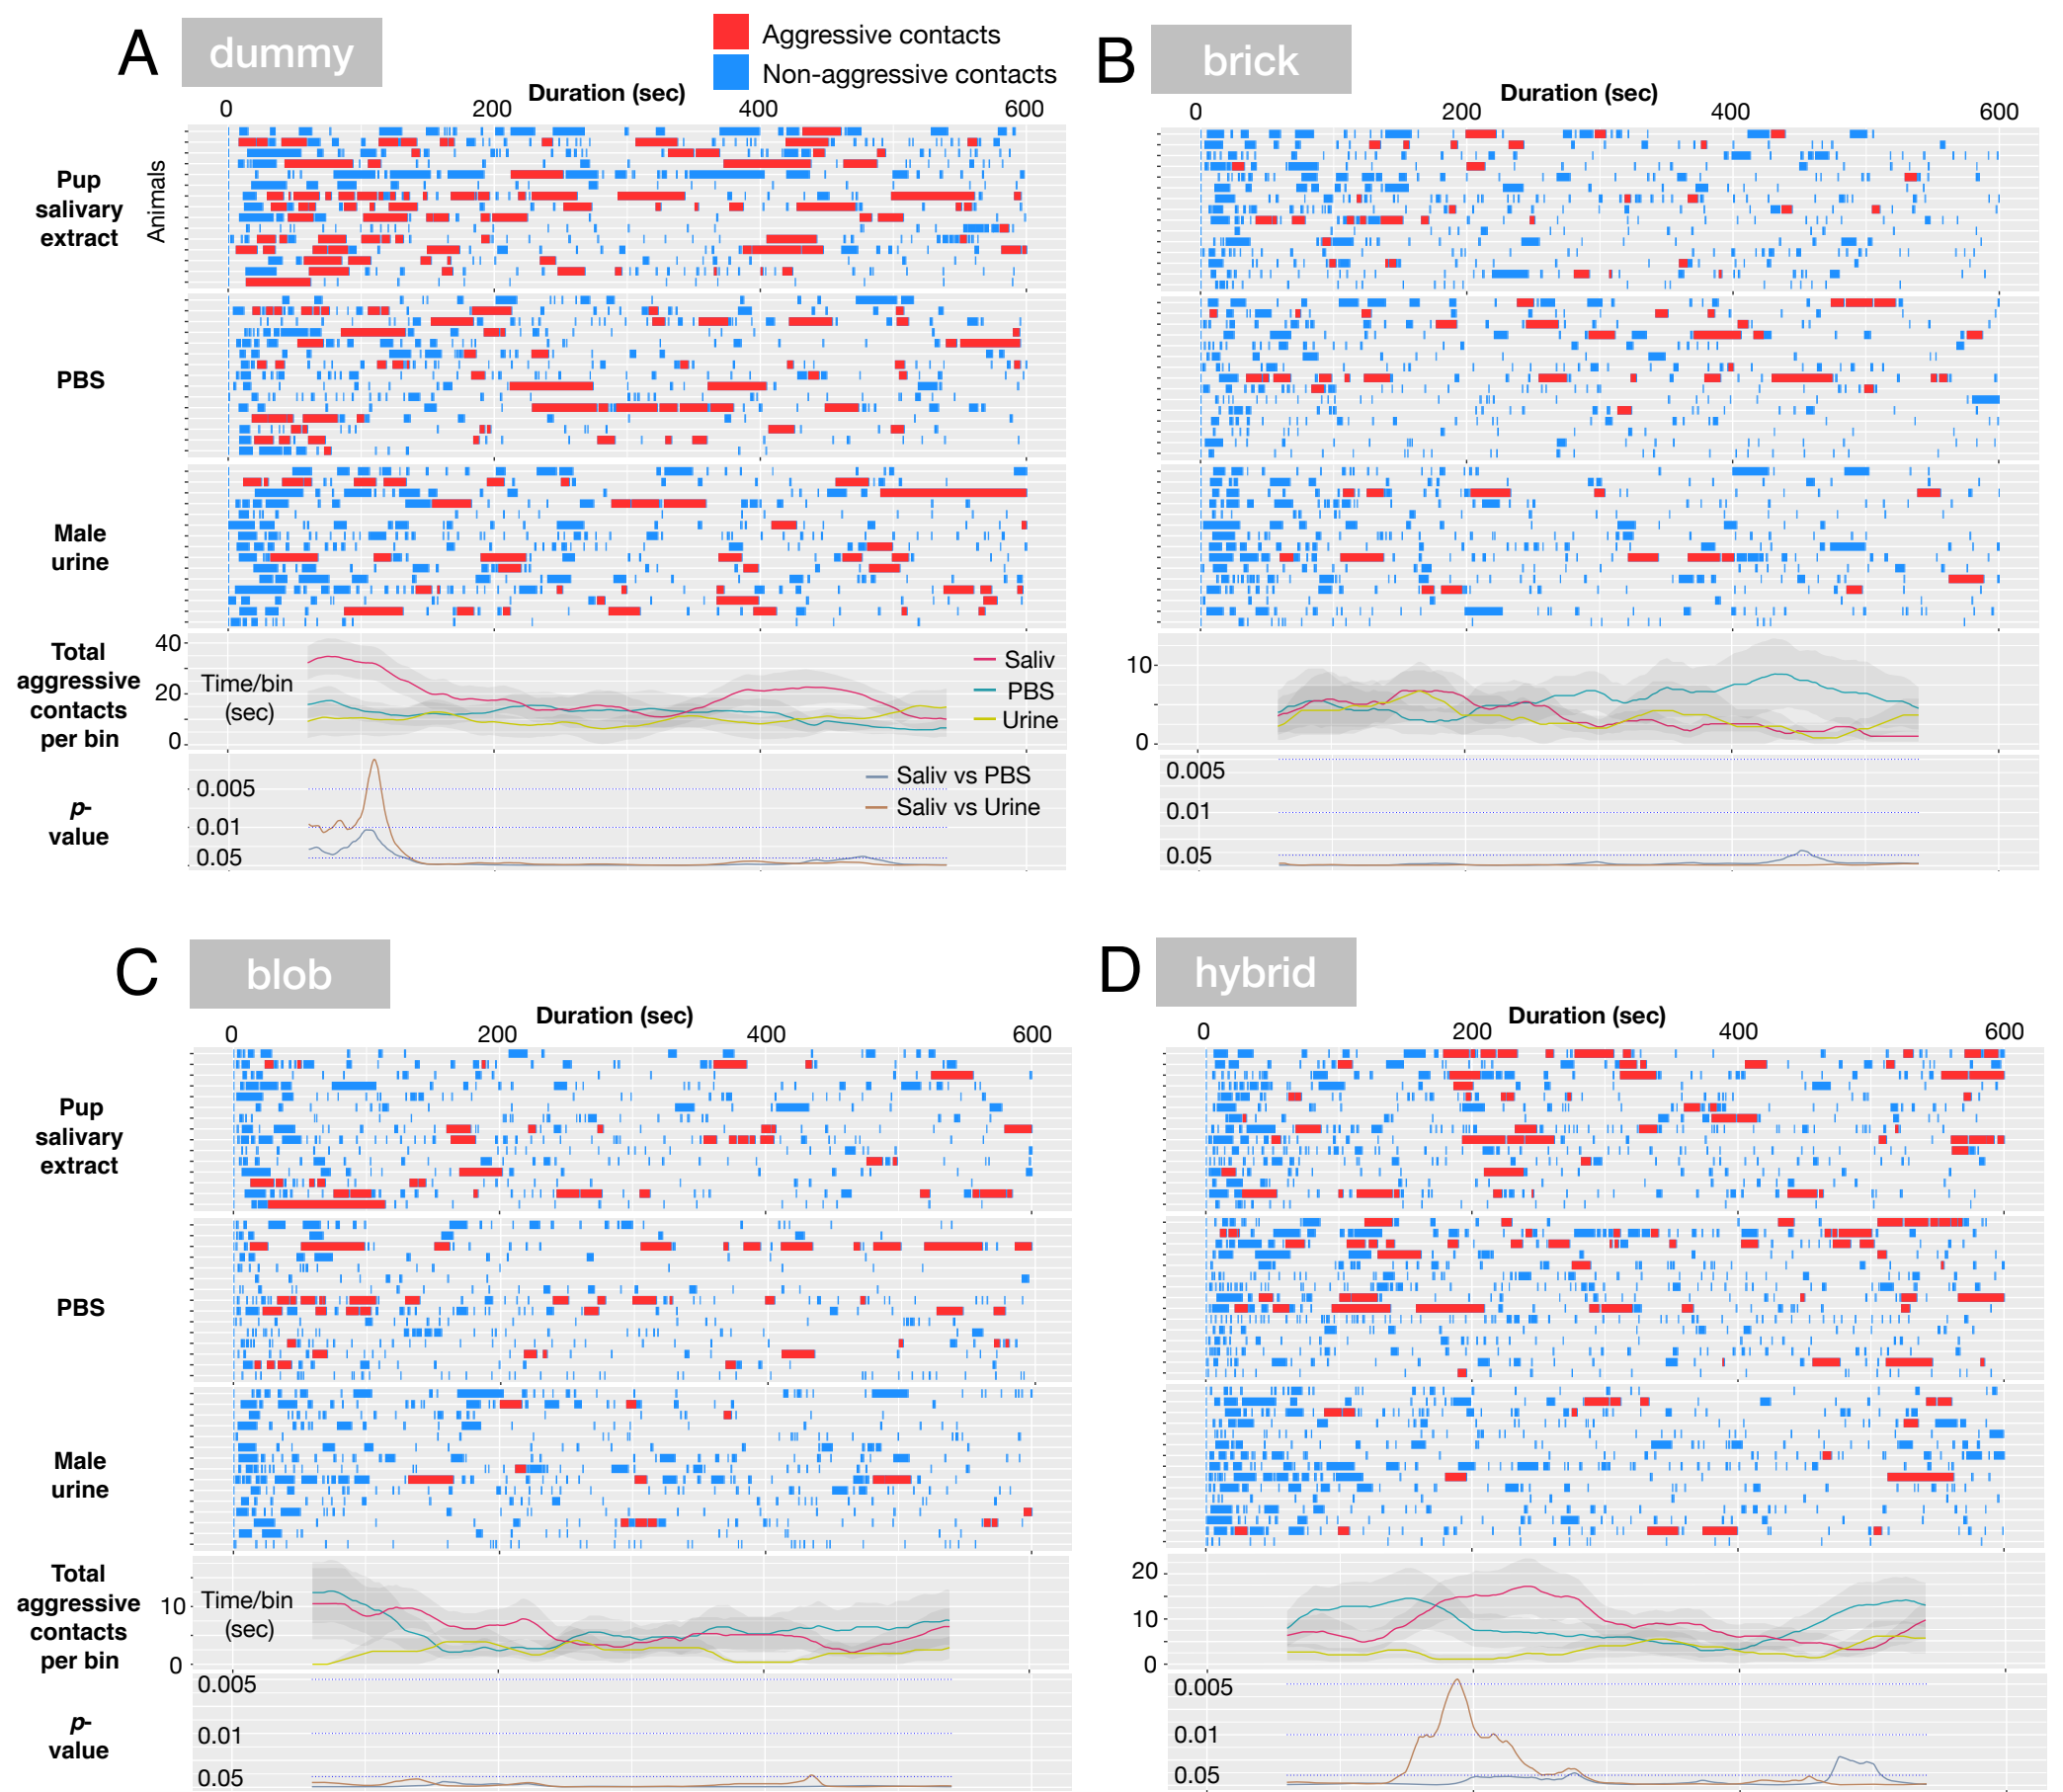

Supplement: NIHMS1515902-supplement-3.pdf [file NIHMS1515902-supplement-3.pdf]

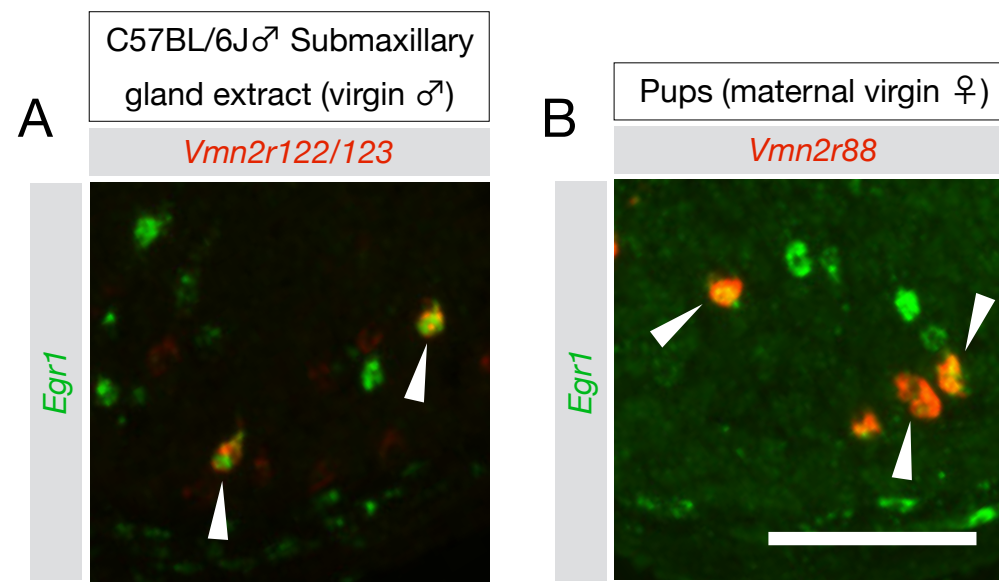

Supplement: NIHMS1515902-supplement-4.pdf [file NIHMS1515902-supplement-4.pdf]
